# Supplementary material
Source: publisher figshare collection journal article supplement (https://acs.figshare.com/ndownloader/files/4571515)
Supplement: Supplementary file 1 [file 4571515]

## I. LOCAL STABILITY CONDITION: STABILITY INDEX

We shall now set up the local stability condition by looking at the relative population of a chain with tetrahedra length  $m$  respect to its neighbors. Basically, the idea is that the chains with length  $m$  would be more stable when the transition rates to  $m$  are larger than the ones from  $m$ .

Looking at the pathways in Fig 2, we write the local stability condition as

$$\begin{aligned}
& T[m_{-1}Si^0 \rightarrow_m Si^0] \times T[m_{+1}Si^0 \rightarrow_m Si^0] \times \\
& T[m_{+1}Si^- \rightarrow_m Si^0] \times T[m_{-1}Si^0 \rightarrow_m Si^-] \times \\
& T[m_{-1}Si^- \rightarrow_m Si^-] \times T[m_{+1}Si^- \rightarrow_m Si^-] \times \\
& T[m_{-1}Si^0 \rightarrow_m Al^-] \times T[m_{+1}Al^- \rightarrow_m Si^0] \times \\
& T[m_{-1}Al^- \rightarrow_m Al^-] \times T[m_{+1}Al^- \rightarrow_m Al^-] > \\
& T[mSi^0 \rightarrow_{m-1} Si^0] \times T[mSi^0 \rightarrow_{m+1} Si^0] \times \\
& T[mSi^0 \rightarrow_{m+1} Si^-] \times T[mSi^- \rightarrow_{m-1} Si^0] \times \\
& T[mSi^- \rightarrow_{m-1} Si^-] \times T[mSi^- \rightarrow_{m+1} Si^-] \times \\
& T[mAl^- \rightarrow_{m-1} Si^0] \times T[mSi^0 \rightarrow_{m+1} Al^-] \times \\
& T[mAl^- \rightarrow_{m-1} Al^-] \times T[mAl^- \rightarrow_{m+1} Al^-]
\end{aligned} \tag{1}$$

where  $T$  is the transition rate per chain and per unit time. On the left side of Eqn 1 we give the transitions for all pathways that drive to the chains with length  $m$ , neutral or negative; while on the right side, for the pathways from  $m$ . Let us now write the expression as a product of fractions

$$\begin{aligned}
& \frac{T[m_{-1}Si^0 \rightarrow_m Si^0]}{T[mSi^0 \rightarrow_{m-1} Si^0]} \times \frac{T[m_{+1}Si^0 \rightarrow_m Si^0]}{T[mSi^0 \rightarrow_{m+1} Si^0]} \times \\
& \frac{T[m_{+1}Si^- \rightarrow_m Si^0]}{T[mSi^0 \rightarrow_{m+1} Si^-]} \times \frac{T[m_{-1}Si^0 \rightarrow_m Si^-]}{T[mSi^- \rightarrow_{m-1} Si^0]} \times \\
& \frac{T[m_{-1}Si^- \rightarrow_m Si^-]}{T[mSi^- \rightarrow_{m-1} Si^-]} \times \frac{T[m_{+1}Si^- \rightarrow_m Si^-]}{T[mSi^- \rightarrow_{m+1} Si^-]} \times \\
& \frac{T[m_{-1}Si^0 \rightarrow_m Al^-]}{T[mAl^- \rightarrow_{m-1} Si^0]} \times \frac{T[m_{+1}Al^- \rightarrow_m Si^0]}{T[mSi^0 \rightarrow_{m+1} Al^-]} \times \\
& \frac{T[m_{-1}Al^- \rightarrow_m Al^-]}{T[mAl^- \rightarrow_{m-1} Al^-]} \times \frac{T[m_{+1}Al^- \rightarrow_m Al^-]}{T[mAl^- \rightarrow_{m+1} Al^-]} > 1
\end{aligned} \tag{2}$$

where the pathways to and from  $m$  are given in the numerator and denominator respectively.

We define  $n({}_mX^q)$  as the average population of chains  ${}_mX^q$  with tetrahedra length  $m$ , where  $X=Si$  or  $Al$  and  $q=+,0$ , or  $-$ . At thermal equilibrium, we have:  $n({}_mX^q)T[{}_mX^q \rightarrow {}_{m-1}Y^p] = n({}_{m-1}Y^p)T[{}_{m-1}Y^p \rightarrow {}_mX^q]$ . Given the Boltzmann distribution function, we can write  $n({}_mX^q) = (N/Z)e^{-(E({}_mX^q)/k_B T)}$ , where  $N$  is the total number of chains,  $Z$  is the partition function,  $E({}_mX^q)$  is the energy of chain size  $m$ ,  $k_B$  is the Boltzmann constant and  $T$  the temperature. Then, combining these two equations we have

$$\frac{T[{}_{m-1}Y^p \rightarrow {}_mX^q]}{T[{}_mX^q \rightarrow {}_{m-1}Y^p]} = e^{-((E({}_mX^q)-E({}_{m-1}Y^p))/k_B T)} \quad (3)$$

Inserting these fractions of transition ratios in Eq. 1 and after little algebra, we find that the local stability condition for length  $m$  is

$$\begin{aligned} & 2E({}_{m-1}Si^0) + E({}_{m-1}Si^-) + E({}_{m+1}Si^0) + 2E({}_{m+1}Si^-) \\ & \quad - 3E({}_mSi^-) - 3E({}_mSi^0) \\ & E({}_{m-1}Si^0) + E({}_{m-1}Al^-) + 2E({}_{m+1}Al^-) \\ & \quad - E({}_mSi^0) - 3E({}_mAl^-) > 0. \end{aligned} \quad (4)$$

One sees that the right hand term in the previous expression may be defined as the local stability index  $\Sigma(m)$ . It gives an idea of the chain stability with length  $m$  respect to its neighbors, when removing or adding monomers following the pathways of Fig. 2. In fact, it is a sort of chemical potential for the involved pathways. Maxima in  $\Sigma(m)$  determine that the chains with length  $m$  are specially stable.

We wish to discuss the role of the  $Al$  pathways, given with full lines in Fig. 2. Thus, we divide the stability index in two contributions

$$\Sigma(m) = \Sigma_{Si}(m) + \Sigma_{Al}(m) \quad (5)$$

where  $\Sigma_{Si}(m)$  comes from the pure  $Si$ -based pathways,

$$\begin{aligned} \Sigma_{Si}(m) = & 2E({}_{m-1}Si^0) + E({}_{m-1}Si^-) + E({}_{m+1}Si^0) + 2E({}_{m+1}Si^-) \\ & - 3E({}_mSi^-) - 3E({}_mSi^0) \end{aligned} \quad (6)$$

and  $\Sigma_{Al}(m)$  denotes the contributions due to the new pathways of aluminosilicate chains,

$$\begin{aligned} \Sigma_{Al}(m) = & E({}_{m-1}Si^0) + E({}_{m-1}Al^-) + 2E({}_{m+1}Al^-) \\ & - E({}_mSi^0) - 3E({}_mAl^-). \end{aligned} \quad (7)$$

TABLE I: Condensation energy of a neutral silicate chain of length m-1 ( $_mSi^0$ ) with an aluminum monomer ( $_1Al^-$ ), with a neutral silicon monomer ( $_1Si^0$ ) and with a charged silicon monomer ( $_1Si^-$ ). Following the same order the end chains are  $_mAl^-$ ,  $_mSi^0$  and  $_mSi^-$ . Remember that the chains are denoted as  $_mX^q$ , where m is the tetrahedra length, q is the charge, and X is Si or Al. X=Si indicate that silicon atoms site in the tetrahedra center; and X=Al, an Al atom is at the end tetrahedra of the chain. Water molecules compensate the missing OHs and the protons in the reactions (see Eqns. 1 and 2 in text for some examples), but to simplify they are not written. Chain growth occurs because these energy differences are exothermic.

| m | $_mAl^-$ | $_mSi^0$ | $_mSi^-$ |
|---|----------|----------|----------|
| 2 | 1.46     | 0.82     | 1.19     |
| 3 | 0.52     | 0.17     | 0.18     |
| 4 | 0.73     | 0.44     | 0.39     |
| 5 | 1.08     | 0.33     | 1.39     |
| 6 | 0.86     | 0.6      | 0.62     |
| 7 | 0.8      | 0.45     | 0.36     |
| 8 | 1.77     | 0.32     | 1.46     |
| 9 | 0.73     | 0.5      | 0.34     |
